# Supplementary material for: Upper zone of growth plate and cartilage matrix associated protein protects cartilage during inflammatory arthritis
Source: PubMed Central journal article supplement (PMC5932879; doi:10.1186/s13075-018-1583-2), 2018-05-02
Supplement: 13075_2018_1583_MOESM3_ESM.pdf [file 13075_2018_1583_MOESM3_ESM.pdf]

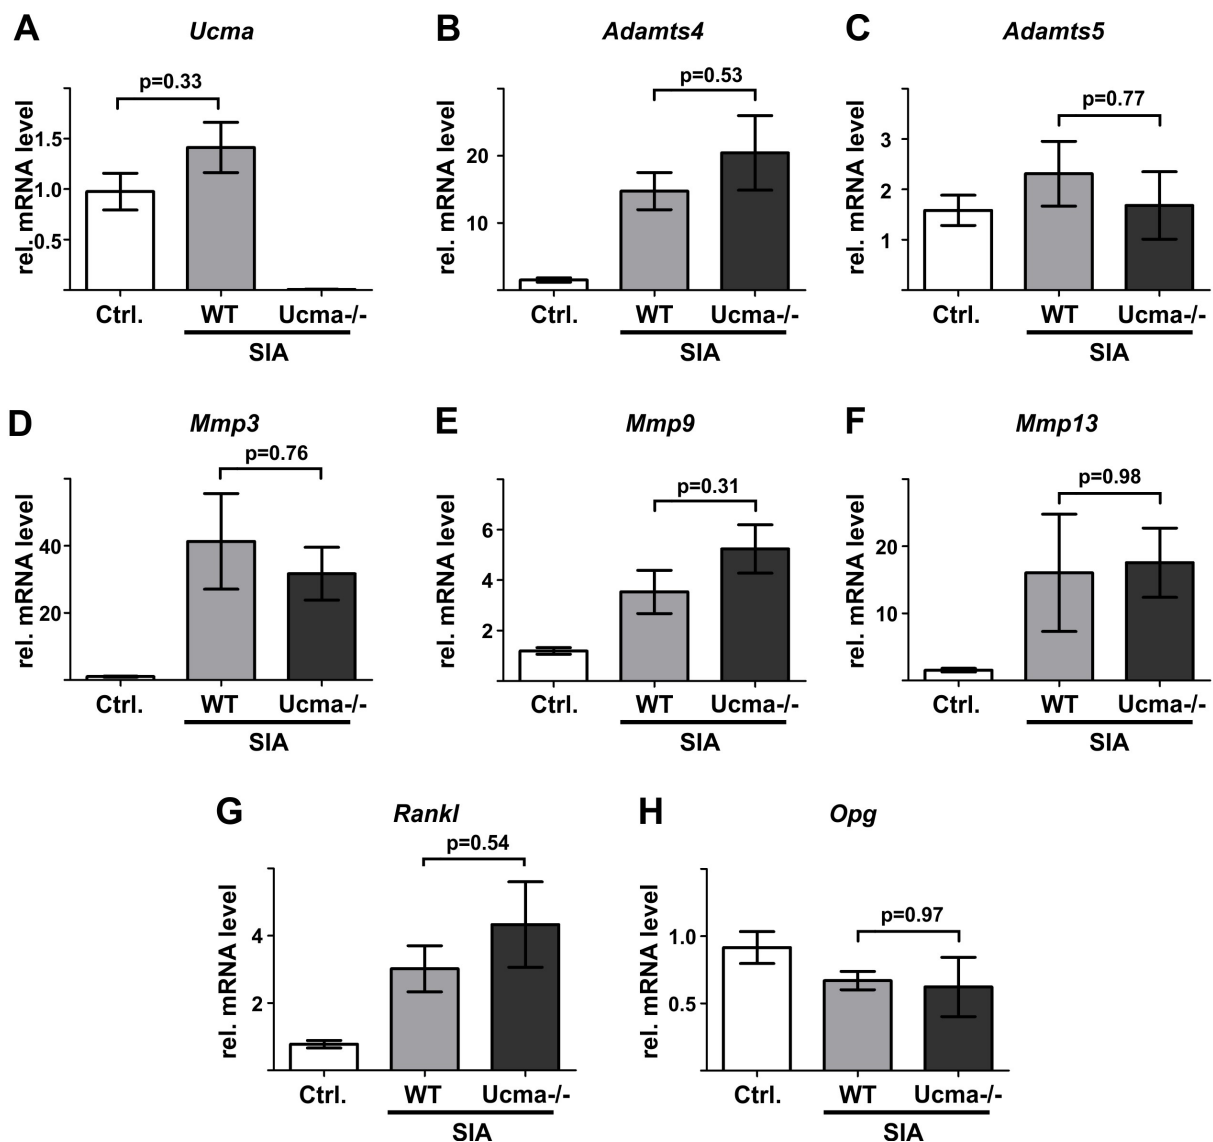

### Additional File 3: Gene expression studies

A-H: Gene expression in joint tissue from the hind paws of non-arthritic controls (Ctrl.) and wild-type (WT) and *Ucma*-deficient mice (*Ucma*<sup>-/-</sup>) with serum-induced arthritis (SIA). Total RNA was extracted from joint tissue from the hind paws of respective mice. Gene expression was analysed by real-time RT-PCR and normalised against cyclophilin A mRNA levels. Means  $\pm$  SEM are shown; n=3 per group. Adamts, A Disintegrin-like and Metalloproteinase with Thrombospondin-1 motifs; Mmp, Matrix Metalloproteinase; Rankl, receptor-activator of nuclear factor kappa B ligand; Opg, osteoprotegerin.
